# Supplementary material for: The Implications of ncRNAs in the Development of Human Diseases
Source: PubMed Central journal article supplement (PMC8006041; doi:10.3390/ncrna7010017), 2021-02-24
Supplement: ncrna-07-00017-s001.pdf [file ncrna-07-00017-s001.pdf]

**Supplementary table 1.** Summary table of the ncRNAs cited in the text. The ncRNAs are organised by category (miRNA, lncRNA, piwi or circRNA). The following information is specified: category, chromosomal location, associated process or disease in the literature and related reference number.

| Gene Symbol    | Category     | Chomosomal Location       | Associated Process or Disease                                                  | Reference  |
|----------------|--------------|---------------------------|--------------------------------------------------------------------------------|------------|
| Circ-Foxo3     | circRNA      | 6:108984657-108986092     | Cell Proliferation                                                             | 66         |
| CDR1AS/CIRS-7  | circRNA      | X:140,781,059-140,783,174 | Parkinson, Alzheimer Myocardial infarction                                     | 61,119,139 |
| PVT1           | lncRNA       | 8:127794533-128101253     | Cancer: breast                                                                 | 93         |
| ANRIL          | lncRNA       | 9:21994778-22032956       | Atherosclerosis                                                                | 130,131    |
| MALAT1         | lncRNA       | 11:65496267-65509085      | Atherosclerosis, Myocardial infarction                                         | 130,131    |
| KCNQ1OT1       | lncRNA       | 11:2640537-2699998        | Atherosclerosis, Myocardial infarction                                         | 130,131    |
| aHIF           | lncRNA       | 14:61747039-61749089      | Myocardial infarction                                                          | 130,131    |
| MIAT           | lncRNA       | 22:26646428-26665877      | Myocardial infarction                                                          | 130,131    |
| ZFAS1          | lncRNA       | 20:49278178-49289260      | Acute Myocardial infarction                                                    | 139        |
| UCA1           | lncRNA       | 19:15828947-15835420      | Acute Myocardial infarction                                                    | 140        |
| MEG3           | lncRNA       | 14:100779410-100829185    | Cancer: cervical, bladder                                                      | 90, 91, 92 |
| RMST           | lncRNA       | 12:97431653-97565015      | Neuronal differentiation                                                       | 111        |
| TUNA           | lncRNA       | 14:95876258-95898568      | Neuronal differentiation                                                       | 11         |
| UCHL1-AS       | lncRNA       | 4:41220074-41256727       | Parkinson                                                                      | 43,118     |
| ncRNA 17A      | ncRNA        | 9:98542043-98541873       | Alzheimer                                                                      | 121, 122   |
| lncRNA-fe ndrr | lncRNA       | 16:86487737-86509099      | Heart differentiation                                                          | 128        |
| lncRNA-H BL1   | lncRNA       | 13:54113951-54116706      | Ischemic heart failure                                                         | 129        |
| lncRNA-B vhr   | lncRNA, mice | 18:61799307-61807126      | Cardiac development                                                            | 126, 127   |
| miR-126-3p     | miRNA        | 9:136670653-136670674     | Ischemia, myocadial fibrosis, ventricular remodeling, arrythmia, heart failure | 132        |
| miR-21-5p      | miRNA        | 17:59841273-5984129       | Ischemia, myocadial fibrosis, ventricular remodeling, arrythmia, heart failure | 132        |
| let-7g-5p      | miRNA        | 3:52268336-52268357       | Myocardial infarction                                                          | 138        |
| miR-106a-5p    | miRNA        | X:134170244-134170266     | Myocardial infarction                                                          | 138        |
| miR-424-5p     | miRNA        | X:134546680-134546701     | Myocardial infarction                                                          | 138        |
| miR-144-3      | miRNA        | 17:28861548-288615        | Myocardial infarction                                                          | 138        |

|                |       |                                                                |                                                     |             |
|----------------|-------|----------------------------------------------------------------|-----------------------------------------------------|-------------|
| p              |       | 67                                                             |                                                     |             |
| miR-660-5<br>p | miRNA | X:50013256-50013277                                            | Myocardial infarction                               | 138         |
| miR-192-5<br>p | miRNA | 11:64891203-64891223                                           | Heart failure                                       | 138         |
| miR-194-5<br>p | miRNA | 1:220118206-220118227;11:64891404-64891425                     | Heart failure                                       | 138         |
| miR-34a-5<br>p | miRNA | 1:9151735-9151756                                              | Heart failure                                       | 138         |
| miR-204-5<br>p | miRNA | 9:70810031-70810052                                            | Type 1 Diabetes                                     | 142         |
| miR-211-5<br>p | miRNA | 15:31065095-31065116                                           | Type 1 Diabetes                                     | 142         |
| miR-30d        | miRNA | 8:134804876-13480494                                           | Diabetes                                            | 143         |
| miR-375        | miRNA | 2:219001645-219001708                                          | Diabetes                                            | 144-146     |
| miR-200        | miRNA | 1:1167863-1167952;12:6963699-6963766                           | Cancer: breast, IgA neuropathy                      | 93,149      |
| miR-155        | miRNA | 21:25573980-25574044                                           | IgA neuropathy                                      | 150         |
| miR-146a       | miRNA | 5:160485352160485450                                           | IgA neuropathy                                      | 150         |
| miR-17/92      | miRNA | 13:91350605-91350688                                           | Cancer                                              | 76,77       |
| miR-143/145    | miRNA | 5:-149428918-149429023;5149430646-149430733                    | Cancer: colon, breast, lung, head and neck, bladder | 78          |
| miR-210        | miRNA | 11:568089-568198                                               | Cancer                                              | 135,136     |
| miR-124        | miRNA | 8:9903388-9903472;8:64379149-6437925;20:63178500-6317858       | Neurogenesis                                        | 110         |
| miR-132        | miRNA | 17:2049908-2050008                                             | Neurogenesis, Synaptic connections                  | 110,112     |
| miR-9          | miRNA | 1:156420341-156420429;5:88666853-88666939;15:89368017-89368106 | Synaptic connections                                | 112         |
| miR-134        | miRNA | 14:101054687-101054759                                         | Synaptic connections                                | 112         |
| miR-138        | miRNA | 3:44114212-44114310;16:56858518-56858601                       | Synaptic connections                                | 112         |
| miR-153        | miRNA | 2:219294111-21929420;7:157574336-157574422                     | Parkinson                                           | 113, 114    |
| miR-7          | miRNA | 9:83969748-83969857;5:88666853-88666939;15:89368017-89368106   | Parkinson                                           | 61,112, 113 |
| miR-106a       | miRNA | X:134170198-134170278                                          | Alzheimer                                           | 123, 124    |
| miR-520c       | miRNA | 19:53707453-53707539                                           | Alzheimer                                           | 123, 124    |
| miR-20a        | miRNA | 13:91351065-91351135                                           | Alzheimer                                           | 123, 124    |

|            |                       |                                             |                         |                   |
|------------|-----------------------|---------------------------------------------|-------------------------|-------------------|
| miR-17     | miRNA                 | 13:91350605-91350688                        | Alzheimer               | 123, 124          |
| miR-16     | miRNA                 | 13:50048973-50049061;3:160404745-160404825  | Alzheimer               | 123, 124          |
| miR-101    | miRNA                 | 1:65058434-65058508;9:4850297-4850375       | Alzheimer               | 123, 124          |
| miR-147    | miRNA                 | 9:120244979-120245050;5:hsa-mir-147b        | Alzheimer               | 123, 124          |
| miR-655    | miRNA                 | 14:101049550-101049646                      | Alzheimer               | 123, 124          |
| miR-323-3p | miRNA                 | 14:101025732-101025817                      | Alzheimer               | 123, 124          |
| miR-644    | miRNA                 | 20:34466325-34466418                        | Alzheimer               | 123, 124          |
| miR-153    | miRNA                 | 2:219294111-219294200;7:157574336-157574422 | Alzheimer               | 123, 124          |
| miR-21     | miRNA                 | 17:59841266-59841337                        | Atherosclerosis         | 135, 136, 180-183 |
| miR-210    | miRNA                 | 11:568089-568198                            | Cancer, Atherosclerosis | 82,135, 136       |
| miR-29     | miRNA, human and mice | 7:130876747-13087681;1:207801852-207801939  | Diabetes                | 147               |
| miR-33     | miRNA, mice           | 22:41900949-41900969                        | Diabetes                | 148               |
| piR-4987   | piRNA                 | 9:113108854-1131088863                      | Cancer: breast          | 101               |
| piR-20365  | piRNA                 | 1:23413356-232423381                        | Cancer: breast          | 101               |
| piR-20485  | piRNA                 | 3:126598591-126598620                       | Cancer: breast          | 101               |
| piR-20582  | piRNA                 | 19:34816976:34817006                        | Cancer: breast          | 101               |
